# Supplementary material
Source: Springer Nature journal article supplement (https://www.springermedizin.de/resource/supplementary/12884_2010_387_MOESM4_ESM.pdf/9457598)

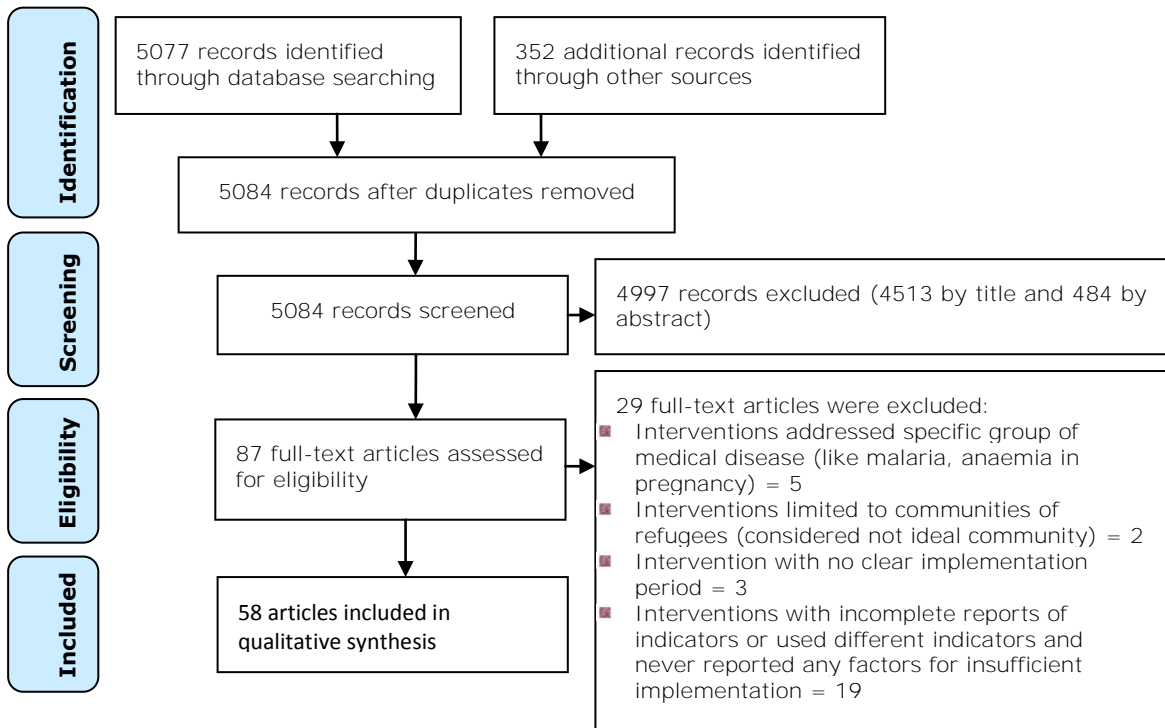

Supplement: MOESM4 [file 9457598]
